# Supplementary material for: Construction of a high-density genetic map: genotyping by sequencing (GBS) to map purple seed coat color (Psc) in hulless barley
Source: Hereditas. 2018 Nov 17;155:37. doi: 10.1186/s41065-018-0072-6 (PMC6240233; doi:10.1186/s41065-018-0072-6)
Supplement: Supplementary file 4 — Gene annotations of 7H within the region encompassing 77.30–78.50 cM. (XLSX 15 kb) [file 41065_2018_72_MOESM4_ESM.xlsx]

## Sheet: seed_color1-lg7-77.30-78
#Trait	Lg	CHR	Transcript_ID	IPR2GO	InterPro	KEGG	Swissprot	TrEMBL
seed_color1	lg7	7	MLOC_63626.1	GO:0010181; FMN binding; Molecular Function|GO:0016491; oxidoreductase activity; Molecular Function|GO:0055114; oxidation-reduction process; Biological Process	IPR001155; NADH:flavin oxidoreductase/NADH oxidase, N-terminal	putative 12-oxophytodienoate reductase 5-like; K05894 12-oxophytodienoic acid reductase [EC:1.3.1.42]	Putative 12-oxophytodienoate reductase 2 OS=Oryza sativa subsp. japonica GN=OPR2 PE=3 SV=1	Uncharacterized protein OS=Hordeum vulgare var. distichum PE=4 SV=1
seed_color1	lg7	7	MLOC_68873.2	--	IPR025564; Cyanobacterial aminoacyl-tRNA synthetase, CAAD domain	--	Protein CURVATURE THYLAKOID 1D, chloroplastic OS=Arabidopsis thaliana GN=CURT1D PE=1 SV=1	Predicted protein OS=Hordeum vulgare var. distichum PE=2 SV=1
seed_color1	lg7	7	MLOC_68873.1	--	--	--	--	Uncharacterized protein OS=Hordeum vulgare var. distichum PE=4 SV=1
seed_color1	lg7	7	MLOC_49418.1	--	--	uncharacterized LOC100844069; K07020	--	Uncharacterized protein OS=Hordeum vulgare var. distichum PE=4 SV=1
seed_color1	lg7	7	MLOC_52178.1	GO:0003700; sequence-specific DNA binding transcription factor activity; Molecular Function|GO:0005634; nucleus; Cellular Component|GO:0006355; regulation of transcription, DNA-dependent; Biological Process	IPR002487; Transcription factor, K-box	agamous-like MADS-box protein AGL8 homolog; K09264 MADS-box transcription factor, plant	MADS-box transcription factor 55 OS=Oryza sativa subsp. japonica GN=MADS55 PE=2 SV=2	Uncharacterized protein OS=Hordeum vulgare var. distichum PE=4 SV=1
seed_color1	lg7	7	MLOC_52178.2	GO:0003700; sequence-specific DNA binding transcription factor activity; Molecular Function|GO:0005634; nucleus; Cellular Component|GO:0006355; regulation of transcription, DNA-dependent; Biological Process	IPR002487; Transcription factor, K-box	agamous-like MADS-box protein AGL8 homolog; K09264 MADS-box transcription factor, plant	MADS-box transcription factor 55 OS=Oryza sativa subsp. japonica GN=MADS55 PE=2 SV=2	MADS box protein VRT-2 OS=Hordeum vulgare var. distichum PE=2 SV=1
seed_color1	lg7	7	MLOC_52178.3	GO:0003700; sequence-specific DNA binding transcription factor activity; Molecular Function|GO:0005634; nucleus; Cellular Component|GO:0006355; regulation of transcription, DNA-dependent; Biological Process	IPR002487; Transcription factor, K-box	agamous-like MADS-box protein AGL8 homolog; K09264 MADS-box transcription factor, plant	MADS-box transcription factor 55 OS=Oryza sativa subsp. japonica GN=MADS55 PE=2 SV=2	MADS box protein VRT-2 (Fragment) OS=Hordeum vulgare var. distichum PE=4 SV=1
seed_color1	lg7	7	MLOC_44595.1	--	IPR008480; Protein of unknown function DUF761, plant	--	--	Uncharacterized protein OS=Hordeum vulgare var. distichum PE=4 SV=1
seed_color1	lg7	7	EPlHVUG00000000223	NONE
seed_color1	lg7	7	MLOC_568.1	--	--	--	--	Uncharacterized protein OS=Hordeum vulgare var. distichum PE=4 SV=1
seed_color1	lg7	7	MLOC_51964.6	--	--	--	Nuclear receptor coactivator 7 OS=Gallus gallus GN=NCOA7 PE=2 SV=1	Uncharacterized protein OS=Hordeum vulgare var. distichum PE=4 SV=1
seed_color1	lg7	7	MLOC_51964.2	--	IPR006571; TLDc	hypothetical protein; K12587 exosome complex component MTR3	Nuclear receptor coactivator 7 OS=Gallus gallus GN=NCOA7 PE=2 SV=1	Uncharacterized protein OS=Hordeum vulgare var. distichum PE=4 SV=1
seed_color1	lg7	7	MLOC_51964.1	--	IPR006571; TLDc	hypothetical protein; K12587 exosome complex component MTR3	TLD domain-containing protein 2 OS=Homo sapiens GN=TLDC2 PE=2 SV=1	Predicted protein OS=Hordeum vulgare var. distichum PE=2 SV=1
seed_color1	lg7	7	MLOC_51964.7	--	--	--	--	Uncharacterized protein OS=Hordeum vulgare var. distichum PE=4 SV=1
seed_color1	lg7	7	MLOC_51964.5	--	IPR006571; TLDc	hypothetical protein; K12587 exosome complex component MTR3	Nuclear receptor coactivator 7 OS=Gallus gallus GN=NCOA7 PE=2 SV=1	Uncharacterized protein OS=Hordeum vulgare var. distichum PE=4 SV=1
seed_color1	lg7	7	MLOC_51964.3	--	IPR006571; TLDc	hypothetical protein; K12587 exosome complex component MTR3	TLD domain-containing protein 2 OS=Homo sapiens GN=TLDC2 PE=2 SV=1	Uncharacterized protein OS=Hordeum vulgare var. distichum PE=4 SV=1
seed_color1	lg7	7	MLOC_53764.1	--	IPR012442; Protein of unknown function DUF1645, plant	--	--	Uncharacterized protein OS=Hordeum vulgare var. distichum PE=4 SV=1
seed_color1	lg7	7	MLOC_23208.1	--	IPR002885; Pentatricopeptide repeat	putative pentatricopeptide repeat-containing protein At1g74580-like; K17964 leucine-rich PPR motif-containing protein, mitochondrial	Pentatricopeptide repeat-containing protein At3g29230 OS=Arabidopsis thaliana GN=PCMP-E27 PE=2 SV=1	Uncharacterized protein OS=Hordeum vulgare var. distichum PE=4 SV=1
seed_color1	lg7	7	MLOC_51960.1	GO:0003682; chromatin binding; Molecular Function	IPR001005; SANT/Myb domain|IPR017930; Myb domain	uncharacterized LOC100842092; K09422 myb proto-oncogene protein, plant	Transcription factor MYB39 OS=Arabidopsis thaliana GN=MYB39 PE=2 SV=1	Uncharacterized protein OS=Hordeum vulgare var. distichum PE=4 SV=1
seed_color1	lg7	7	MLOC_53132.1	--	IPR006766; Phosphate-induced protein 1	--	Protein EXORDIUM OS=Arabidopsis thaliana GN=EXO PE=2 SV=1	Uncharacterized protein OS=Hordeum vulgare var. distichum PE=4 SV=1
seed_color1	lg7	7	MLOC_53132.2	--	IPR006766; Phosphate-induced protein 1	--	Protein EXORDIUM OS=Arabidopsis thaliana GN=EXO PE=2 SV=1	Uncharacterized protein OS=Hordeum vulgare var. distichum PE=4 SV=1
seed_color1	lg7	7	MLOC_57734.1	--	--	Os06g0219500; K13993 HSP20 family protein	26.2 kDa heat shock protein, mitochondrial OS=Oryza sativa subsp. japonica GN=HSP26.2 PE=2 SV=1	Uncharacterized protein OS=Hordeum vulgare var. distichum PE=4 SV=1
seed_color1	lg7	7	MLOC_68874.1	GO:0003700; sequence-specific DNA binding transcription factor activity; Molecular Function|GO:0006355; regulation of transcription, DNA-dependent; Biological Process	IPR001471; AP2/ERF domain	hypothetical protein; K09286 EREBP-like factor	Ethylene-responsive transcription factor ERF053 OS=Arabidopsis thaliana GN=ERF053 PE=2 SV=1	Uncharacterized protein OS=Hordeum vulgare var. distichum PE=4 SV=1
seed_color1	lg7	7	MLOC_64284.1	--	--	--	Kinesin-like protein KCA1 OS=Arabidopsis thaliana GN=KCA1 PE=1 SV=1	Kinesin-like protein OS=Hordeum vulgare var. distichum PE=2 SV=1
seed_color1	lg7	7	MLOC_64284.2	--	--	--	Kinesin-like protein KCA1 OS=Arabidopsis thaliana GN=KCA1 PE=1 SV=1	Uncharacterized protein OS=Hordeum vulgare var. distichum PE=4 SV=1
seed_color1	lg7	7	MLOC_45963.3	GO:0030674; protein binding, bridging; Molecular Function|GO:0051015; actin filament binding; Molecular Function	IPR022768; Fascin domain	exo-beta-1,3-glucanase (Exg1), putative; K01210 glucan 1,3-beta-glucosidase [EC:3.2.1.58]	Probable glucan 1,3-beta-glucosidase A OS=Aspergillus clavatus (strain ATCC 1007 / CBS 513.65 / DSM 816 / NCTC 3887 / NRRL 1) GN=exgA PE=3 SV=2	Uncharacterized protein OS=Hordeum vulgare var. distichum PE=4 SV=1
seed_color1	lg7	7	MLOC_45963.9	GO:0004553; hydrolase activity, hydrolyzing O-glycosyl compounds; Molecular Function|GO:0005975; carbohydrate metabolic process; Biological Process	IPR001547; Glycoside hydrolase, family 5	exo-beta-1,3-glucanase (Exg1) (EC:3.2.1.58); K01210 glucan 1,3-beta-glucosidase [EC:3.2.1.58]	Probable glucan 1,3-beta-glucosidase A OS=Aspergillus clavatus (strain ATCC 1007 / CBS 513.65 / DSM 816 / NCTC 3887 / NRRL 1) GN=exgA PE=3 SV=2	Uncharacterized protein OS=Hordeum vulgare var. distichum PE=3 SV=1
seed_color1	lg7	7	MLOC_45963.8	--	--	glycoside hydrolase family 5 protein; K01210 glucan 1,3-beta-glucosidase [EC:3.2.1.58]	Glucan 1,3-beta-glucosidase A OS=Aspergillus oryzae (strain ATCC 42149 / RIB 40) GN=exgA PE=1 SV=1	Uncharacterized protein OS=Hordeum vulgare var. distichum PE=4 SV=1
seed_color1	lg7	7	MLOC_45963.2	GO:0004553; hydrolase activity, hydrolyzing O-glycosyl compounds; Molecular Function|GO:0005975; carbohydrate metabolic process; Biological Process	IPR001547; Glycoside hydrolase, family 5	Sporulation-specific exo-1,3-beta-glucanase; K01210 glucan 1,3-beta-glucosidase [EC:3.2.1.58]	Probable glucan 1,3-beta-glucosidase A OS=Aspergillus terreus (strain NIH 2624 / FGSC A1156) GN=exgA PE=3 SV=1	Uncharacterized protein OS=Hordeum vulgare var. distichum PE=3 SV=1
seed_color1	lg7	7	MLOC_45963.5	GO:0004553; hydrolase activity, hydrolyzing O-glycosyl compounds; Molecular Function|GO:0005975; carbohydrate metabolic process; Biological Process	IPR001547; Glycoside hydrolase, family 5	Sporulation-specific exo-1,3-beta-glucanase; K01210 glucan 1,3-beta-glucosidase [EC:3.2.1.58]	Probable glucan 1,3-beta-glucosidase A OS=Aspergillus terreus (strain NIH 2624 / FGSC A1156) GN=exgA PE=3 SV=1	Uncharacterized protein OS=Hordeum vulgare var. distichum PE=3 SV=1
seed_color1	lg7	7	MLOC_45963.1	GO:0004553; hydrolase activity, hydrolyzing O-glycosyl compounds; Molecular Function|GO:0005975; carbohydrate metabolic process; Biological Process	IPR001547; Glycoside hydrolase, family 5	exo-beta-1,3-glucanase (Exg1) (EC:3.2.1.58); K01210 glucan 1,3-beta-glucosidase [EC:3.2.1.58]	Probable glucan 1,3-beta-glucosidase A OS=Aspergillus clavatus (strain ATCC 1007 / CBS 513.65 / DSM 816 / NCTC 3887 / NRRL 1) GN=exgA PE=3 SV=2	Uncharacterized protein OS=Hordeum vulgare var. distichum PE=3 SV=1
seed_color1	lg7	7	MLOC_45963.4	GO:0030674; protein binding, bridging; Molecular Function|GO:0051015; actin filament binding; Molecular Function	IPR022768; Fascin domain	exo-beta-1,3-glucanase (Exg1), putative; K01210 glucan 1,3-beta-glucosidase [EC:3.2.1.58]	Probable glucan 1,3-beta-glucosidase A OS=Aspergillus clavatus (strain ATCC 1007 / CBS 513.65 / DSM 816 / NCTC 3887 / NRRL 1) GN=exgA PE=3 SV=2	Uncharacterized protein OS=Hordeum vulgare var. distichum PE=4 SV=1
seed_color1	lg7	7	MLOC_45963.7	GO:0004553; hydrolase activity, hydrolyzing O-glycosyl compounds; Molecular Function|GO:0005975; carbohydrate metabolic process; Biological Process	IPR001547; Glycoside hydrolase, family 5	hypothetical protein; K01210 glucan 1,3-beta-glucosidase [EC:3.2.1.58]	Probable glucan 1,3-beta-glucosidase A OS=Aspergillus terreus (strain NIH 2624 / FGSC A1156) GN=exgA PE=3 SV=1	Uncharacterized protein OS=Hordeum vulgare var. distichum PE=3 SV=1
seed_color1	lg7	7	MLOC_45963.6	GO:0004553; hydrolase activity, hydrolyzing O-glycosyl compounds; Molecular Function|GO:0005975; carbohydrate metabolic process; Biological Process	IPR001547; Glycoside hydrolase, family 5	Sporulation-specific exo-1,3-beta-glucanase; K01210 glucan 1,3-beta-glucosidase [EC:3.2.1.58]	Probable glucan 1,3-beta-glucosidase A OS=Aspergillus terreus (strain NIH 2624 / FGSC A1156) GN=exgA PE=3 SV=1	Uncharacterized protein OS=Hordeum vulgare var. distichum PE=3 SV=1
seed_color1	lg7	7	MLOC_62206.1	GO:0005507; copper ion binding; Molecular Function|GO:0009055; electron carrier activity; Molecular Function	IPR003245; Plastocyanin-like	--	Blue copper protein OS=Pisum sativum PE=2 SV=1	Uncharacterized protein OS=Hordeum vulgare var. distichum PE=4 SV=1
seed_color1	lg7	7	MLOC_71630.1	GO:0008152; metabolic process; Biological Process|GO:0016787; hydrolase activity; Molecular Function	IPR013094; Alpha/beta hydrolase fold-3	uncharacterized LOC101767448; K17872 NADH:ubiquinone reductase (non-electrogenic) [EC:1.6.5.9]	2-hydroxyisoflavanone dehydratase OS=Glycyrrhiza echinata GN=HIDM PE=1 SV=1	Uncharacterized protein OS=Hordeum vulgare var. distichum PE=4 SV=1
seed_color1	lg7	7	EPlHVUG00000000961	NONE
seed_color1	lg7	7	MLOC_52260.1	GO:0005507; copper ion binding; Molecular Function|GO:0016491; oxidoreductase activity; Molecular Function|GO:0055114; oxidation-reduction process; Biological Process	IPR001117; Multicopper oxidase, type 1|IPR011706; Multicopper oxidase, type 2|IPR011707; Multicopper oxidase, type 3	L-ascorbate oxidase-like; K00423 L-ascorbate oxidase [EC:1.10.3.3]	Putative laccase-9 OS=Oryza sativa subsp. japonica GN=LAC9 PE=3 SV=1	Laccase OS=Hordeum vulgare var. distichum PE=2 SV=1
seed_color1	lg7	7	MLOC_4149.2	--	IPR001623; DnaJ domain	chaperone protein dnaJ 1, mitochondrial-like; K03686 molecular chaperone DnaJ	Chaperone protein dnaJ 1, mitochondrial OS=Arabidopsis thaliana GN=ATJ1 PE=2 SV=2	Uncharacterized protein OS=Hordeum vulgare var. distichum PE=4 SV=1
seed_color1	lg7	7	MLOC_4149.4	--	IPR001623; DnaJ domain	chaperone protein dnaJ 1, mitochondrial-like; K03686 molecular chaperone DnaJ	Chaperone protein dnaJ 1, mitochondrial OS=Arabidopsis thaliana GN=ATJ1 PE=2 SV=2	Uncharacterized protein OS=Hordeum vulgare var. distichum PE=4 SV=1
seed_color1	lg7	7	MLOC_4149.1	--	IPR001623; DnaJ domain	chaperone protein dnaJ 1, mitochondrial-like; K03686 molecular chaperone DnaJ	Chaperone protein dnaJ 1, mitochondrial OS=Arabidopsis thaliana GN=ATJ1 PE=2 SV=2	Uncharacterized protein OS=Hordeum vulgare var. distichum PE=4 SV=1
seed_color1	lg7	7	MLOC_4149.3	--	IPR001623; DnaJ domain	chaperone protein dnaJ 1, mitochondrial-like; K03686 molecular chaperone DnaJ	Chaperone protein dnaJ 1, mitochondrial OS=Arabidopsis thaliana GN=ATJ1 PE=2 SV=2	Uncharacterized protein OS=Hordeum vulgare var. distichum PE=4 SV=1
seed_color1	lg7	7	MLOC_4149.5	--	IPR001623; DnaJ domain	chaperone protein dnaJ 1, mitochondrial-like; K03686 molecular chaperone DnaJ	Chaperone protein DnaJ OS=Picrophilus torridus (strain ATCC 700027 / DSM 9790 / JCM 10055 / NBRC 100828) GN=dnaJ PE=3 SV=1	Uncharacterized protein OS=Hordeum vulgare var. distichum PE=4 SV=1
seed_color1	lg7	7	MLOC_80114.1	GO:0005509; calcium ion binding; Molecular Function	IPR002048; EF-hand domain	SORBIDRAFT_04g034056, Sb04g034056; hypothetical protein; K02183 calmodulin	--	Uncharacterized protein OS=Hordeum vulgare var. distichum PE=4 SV=1
seed_color1	lg7	7	MLOC_20326.1	GO:0003700; sequence-specific DNA binding transcription factor activity; Molecular Function|GO:0006355; regulation of transcription, DNA-dependent; Biological Process|GO:0043565; sequence-specific DNA binding; Molecular Function	IPR004827; Basic-leucine zipper domain	ABSCISIC ACID-INSENSITIVE 5-like protein 5-like; K14432 ABA responsive element binding factor	bZIP transcription factor TRAB1 OS=Oryza sativa subsp. japonica GN=TRAB1 PE=1 SV=1	Uncharacterized protein OS=Hordeum vulgare var. distichum PE=4 SV=1
seed_color1	lg7	7	MLOC_20326.2	GO:0003700; sequence-specific DNA binding transcription factor activity; Molecular Function|GO:0006355; regulation of transcription, DNA-dependent; Biological Process|GO:0043565; sequence-specific DNA binding; Molecular Function	IPR004827; Basic-leucine zipper domain	ABSCISIC ACID-INSENSITIVE 5-like protein 5-like; K14432 ABA responsive element binding factor	bZIP transcription factor TRAB1 OS=Oryza sativa subsp. japonica GN=TRAB1 PE=1 SV=1	Uncharacterized protein OS=Hordeum vulgare var. distichum PE=4 SV=1
seed_color1	lg7	7	MLOC_62205.1	--	IPR002885; Pentatricopeptide repeat	hypothetical protein; K17964 leucine-rich PPR motif-containing protein, mitochondrial	Pentatricopeptide repeat-containing protein At5g18475 OS=Arabidopsis thaliana GN=At5g18475 PE=2 SV=1	Predicted protein (Fragment) OS=Hordeum vulgare var. distichum PE=2 SV=1
seed_color1	lg7	7	MLOC_62205.2	--	IPR002885; Pentatricopeptide repeat	hypothetical protein; K17964 leucine-rich PPR motif-containing protein, mitochondrial	Pentatricopeptide repeat-containing protein At5g18475 OS=Arabidopsis thaliana GN=At5g18475 PE=2 SV=1	Uncharacterized protein OS=Hordeum vulgare var. distichum PE=4 SV=1
seed_color1	lg7	7	MLOC_36488.3	GO:0004861; cyclin-dependent protein serine/threonine kinase inhibitor activity; Molecular Function|GO:0005634; nucleus; Cellular Component|GO:0007050; cell cycle arrest; Biological Process	IPR003175; Cyclin-dependent kinase inhibitor	--	Cyclin-dependent kinase inhibitor 2 OS=Oryza sativa subsp. japonica GN=KRP2 PE=2 SV=1	Uncharacterized protein OS=Hordeum vulgare var. distichum PE=4 SV=1
seed_color1	lg7	7	MLOC_36488.1	--	--	--	Cyclin-dependent kinase inhibitor 2 OS=Oryza sativa subsp. japonica GN=KRP2 PE=2 SV=1	Uncharacterized protein OS=Hordeum vulgare var. distichum PE=4 SV=1
seed_color1	lg7	7	MLOC_36488.2	GO:0004861; cyclin-dependent protein serine/threonine kinase inhibitor activity; Molecular Function|GO:0005634; nucleus; Cellular Component|GO:0007050; cell cycle arrest; Biological Process	IPR003175; Cyclin-dependent kinase inhibitor	--	Cyclin-dependent kinase inhibitor 2 OS=Oryza sativa subsp. japonica GN=KRP2 PE=2 SV=1	Uncharacterized protein OS=Hordeum vulgare var. distichum PE=4 SV=1
seed_color1	lg7	7	MLOC_37394.1	--	IPR005282; Lysosomal cystine transporter|IPR006603; Cystinosin/ERS1p repeat	cystinosin homolog; K12386 cystinosin	Cystinosin homolog OS=Arabidopsis thaliana GN=At5g40670 PE=2 SV=1	Predicted protein OS=Hordeum vulgare var. distichum PE=2 SV=1
seed_color1	lg7	7	MLOC_37394.3	--	IPR006603; Cystinosin/ERS1p repeat	cystinosin homolog; K12386 cystinosin	Cystinosin homolog OS=Arabidopsis thaliana GN=At5g40670 PE=2 SV=1	Uncharacterized protein OS=Hordeum vulgare var. distichum PE=4 SV=1
seed_color1	lg7	7	MLOC_37394.2	--	IPR006603; Cystinosin/ERS1p repeat	cystinosin homolog; K12386 cystinosin	Cystinosin homolog OS=Arabidopsis thaliana GN=At5g40670 PE=2 SV=1	Uncharacterized protein OS=Hordeum vulgare var. distichum PE=4 SV=1
seed_color1	lg7	7	MLOC_38552.1	--	--	--	--	Uncharacterized protein OS=Hordeum vulgare var. distichum PE=4 SV=1
seed_color1	lg7	7	MLOC_21648.1	--	IPR007658; Protein of unknown function DUF594|IPR025315; Domain of unknown function DUF4220	--	--	Uncharacterized protein OS=Hordeum vulgare var. distichum PE=4 SV=1
seed_color1	lg7	7	MLOC_57733.4	--	IPR019378; GDP-fucose protein O-fucosyltransferase	Phosphoglucomutase; K01835 phosphoglucomutase [EC:5.4.2.2]	Uncharacterized protein At1g04910 OS=Arabidopsis thaliana GN=At1g04910 PE=2 SV=1	Uncharacterized protein OS=Hordeum vulgare var. distichum PE=4 SV=1
seed_color1	lg7	7	MLOC_57733.1	--	IPR019378; GDP-fucose protein O-fucosyltransferase	Phosphoglucomutase; K01835 phosphoglucomutase [EC:5.4.2.2]	Uncharacterized protein At1g04910 OS=Arabidopsis thaliana GN=At1g04910 PE=2 SV=1	Uncharacterized protein OS=Hordeum vulgare var. distichum PE=4 SV=1
seed_color1	lg7	7	MLOC_57733.2	--	IPR019378; GDP-fucose protein O-fucosyltransferase	Phosphoglucomutase; K01835 phosphoglucomutase [EC:5.4.2.2]	Uncharacterized protein At1g04910 OS=Arabidopsis thaliana GN=At1g04910 PE=2 SV=1	Uncharacterized protein OS=Hordeum vulgare var. distichum PE=4 SV=1
seed_color1	lg7	7	MLOC_57733.3	--	IPR019378; GDP-fucose protein O-fucosyltransferase	Phosphoglucomutase; K01835 phosphoglucomutase [EC:5.4.2.2]	Uncharacterized protein At1g04910 OS=Arabidopsis thaliana GN=At1g04910 PE=2 SV=1	Uncharacterized protein OS=Hordeum vulgare var. distichum PE=4 SV=1
